# Supplementary material for: The Assignment of the Absolute Configuration of Non-Cyclic Sesquiterpenes by Vibrational and Electronic Circular Dichroism: The Example of Chiliadenus lopadusanus Metabolites
Source: MDPI journal article supplement (doi:10.3390/biom11121902), 2021-12-18

# **The assignment of the absolute configuration of non-cyclic sesquiterpenes by vibrational and electronic circular dichroism: the example of chiliadenus lopadusanus metabolites**

**Giuseppe Mazzeo , Alessio Cimmino, Giovanna Longhi, Marco Masi, Antonio Evidente, and Sergio Abbate**

## **LIST OF FIGURES AND TABLES**

Table S1: Similarity Indices SI and Sim\_NN for selected values of scaling factors for the four possible AC choices, (3S,9R), (3S,9S), (3R,9S), (3R,9R).

Figure S1: graphical representations of SI as function of scaling factors SF for the AC two choices (3S,9R) and (3S,9S).

Table S2: energetics in  $\Delta E$  and  $\Delta G$  for AC (3S,9R).

Figures S2-S4 for the 3D-representation of (3S,9R)-conformers ordered in  $\Delta E$ -population factors;

Figures S5-S7 for 3D-representation of (3S,9R)-conformers ordered in  $\Delta G$ -population factors.

Table S3: energetics in  $\Delta E$  and  $\Delta G$  for AC (3S,9S).

Figures S8-S11: the 3D-representation of (3S,9S)-conformers ordered in  $\Delta E$ -population factors.

Figures S12-S14: 3D-representation of (3S,9S)-conformers ordered in  $\Delta G$ -population factors.

TABLE S1

| Isomer  | S.I.(1.00)   | S.I.(0.99)   | S.I.(0.98)   | S.I.(0.97)   | S.I.(0.96)   | S.I.(0.95)   | $\Delta G$ spectra average |
|---------|--------------|--------------|--------------|--------------|--------------|--------------|----------------------------|
| (3S,9R) | 0.10         | 0.31         | 0.42         | 0.27         | 0.12         | 0.08         |                            |
| (3S,9S) | 0.03         | -0.06        | -0.04        | 0.24         | 0.19         | -0.02        |                            |
| Isomer  | Sim_NN(1.00) | Sim_NN(0.99) | Sim_NN(0.98) | Sim_NN(0.97) | Sim_NN(0.96) | Sim_NN(0.95) |                            |
| (3S,9R) | 0.05         | 0.18         | 0.26         | 0.15         | 0.07         | 0.04         |                            |
| (3S,9S) | 0.01         | -0.03        | -0.02        | 0.13         | 0.10         | -0.01        |                            |

| Isomer  | S.I.(1.00)   | S.I.(0.99)   | S.I.(0.98)   | S.I.(0.97)   | S.I.(0.96)   | S.I.(0.95)   | $\Delta E$ spectra average |
|---------|--------------|--------------|--------------|--------------|--------------|--------------|----------------------------|
| (3S,9R) | 0.22         | 0.38         | 0.54         | 0.29         | 0.08         | 0.10         |                            |
| (3S,9S) | -0.04        | -0.10        | 0.04         | 0.26         | 0.28         | 0.09         |                            |
| Isomer  | Sim_NN(1.00) | Sim_NN(0.99) | Sim_NN(0.98) | Sim_NN(0.97) | Sim_NN(0.96) | Sim_NN(0.95) |                            |
| (3S,9R) | 0.12         | 0.22         | 0.34         | 0.16         | 0.04         | 0.05         |                            |
| (3S,9S) | -0.04        | -0.05        | 0.02         | 0.15         | 0.16         | 0.05         |                            |

| Isomer  | S.I.(1.00)   | S.I.(0.99)   | S.I.(0.98)   | S.I.(0.97)   | S.I.(0.96)   | S.I.(0.95)   | $\Delta G$ spectra average |
|---------|--------------|--------------|--------------|--------------|--------------|--------------|----------------------------|
| (3R,9S) | -0.10        | -0.31        | -0.42        | -0.27        | -0.12        | -0.01        |                            |
| (3R,9R) | -0.03        | 0.06         | 0.04         | -0.24        | -0.19        | 0.02         |                            |
| Isomer  | Sim_NN(1.00) | Sim_NN(0.99) | Sim_NN(0.98) | Sim_NN(0.97) | Sim_NN(0.96) | Sim_NN(0.95) |                            |
| (3R,9S) | -0.05        | -0.18        | -0.26        | -0.15        | -0.07        | -0.03        |                            |
| (3R,9R) | -0.01        | 0.03         | 0.02         | -0.13        | -0.10        | 0.01         |                            |

| Isomer  | S.I.(1.00)   | S.I.(0.99)   | S.I.(0.98)   | S.I.(0.97)   | S.I.(0.96)   | S.I.(0.95)   | $\Delta E$ spectra average |
|---------|--------------|--------------|--------------|--------------|--------------|--------------|----------------------------|
| (3R,9S) | -0.22        | -0.43        | -0.54        | -0.29        | -0.08        | -0.15        |                            |
| (3R,9R) | 0.08         | 0.10         | -0.04        | -0.26        | -0.28        | -0.09        |                            |
| Isomer  | Sim_NN(1.00) | Sim_NN(0.99) | Sim_NN(0.98) | Sim_NN(0.97) | Sim_NN(0.96) | Sim_NN(0.95) |                            |
| (3R,9S) | -0.12        | -0.25        | -0.34        | -0.16        | -0.04        | -0.08        |                            |
| (3R,9R) | 0.04         | 0.05         | -0.02        | -0.15        | -0.16        | -0.05        |                            |

FIGURE S1

| Isomer  | S.I.(1.00)   | S.I.(0.99)   | S.I.(0.98)   | S.I.(0.97)   | S.I.(0.96)   | S.I.(0.95)   | $\Delta G$ spectra average |
|---------|--------------|--------------|--------------|--------------|--------------|--------------|----------------------------|
| (3S,9R) | 0.10         | 0.31         | 0.42         | 0.27         | 0.12         | 0.08         |                            |
| (3S,9S) | 0.03         | -0.06        | -0.04        | 0.24         | 0.19         | -0.02        |                            |
| Isomer  | Sim_NN(1.00) | Sim_NN(0.99) | Sim_NN(0.98) | Sim_NN(0.97) | Sim_NN(0.96) | Sim_NN(0.95) |                            |
| (3S,9R) | 0.05         | 0.18         | 0.26         | 0.15         | 0.07         | 0.04         |                            |
| (3S,9S) | 0.01         | -0.03        | -0.02        | 0.13         | 0.10         | -0.01        |                            |

| Isomer  | S.I.(1.00)   | S.I.(0.99)   | S.I.(0.98)   | S.I.(0.97)   | S.I.(0.96)   | S.I.(0.95)   | $\Delta E$ spectra average |
|---------|--------------|--------------|--------------|--------------|--------------|--------------|----------------------------|
| (3S,9R) | 0.22         | 0.38         | 0.54         | 0.29         | 0.08         | 0.10         |                            |
| (3S,9S) | -0.04        | -0.10        | 0.04         | 0.26         | 0.28         | 0.09         |                            |
| Isomer  | Sim_NN(1.00) | Sim_NN(0.99) | Sim_NN(0.98) | Sim_NN(0.97) | Sim_NN(0.96) | Sim_NN(0.95) |                            |
| (3S,9R) | 0.12         | 0.22         | 0.34         | 0.16         | 0.04         | 0.05         |                            |
| (3S,9S) | -0.04        | -0.05        | 0.02         | 0.15         | 0.16         | 0.05         |                            |

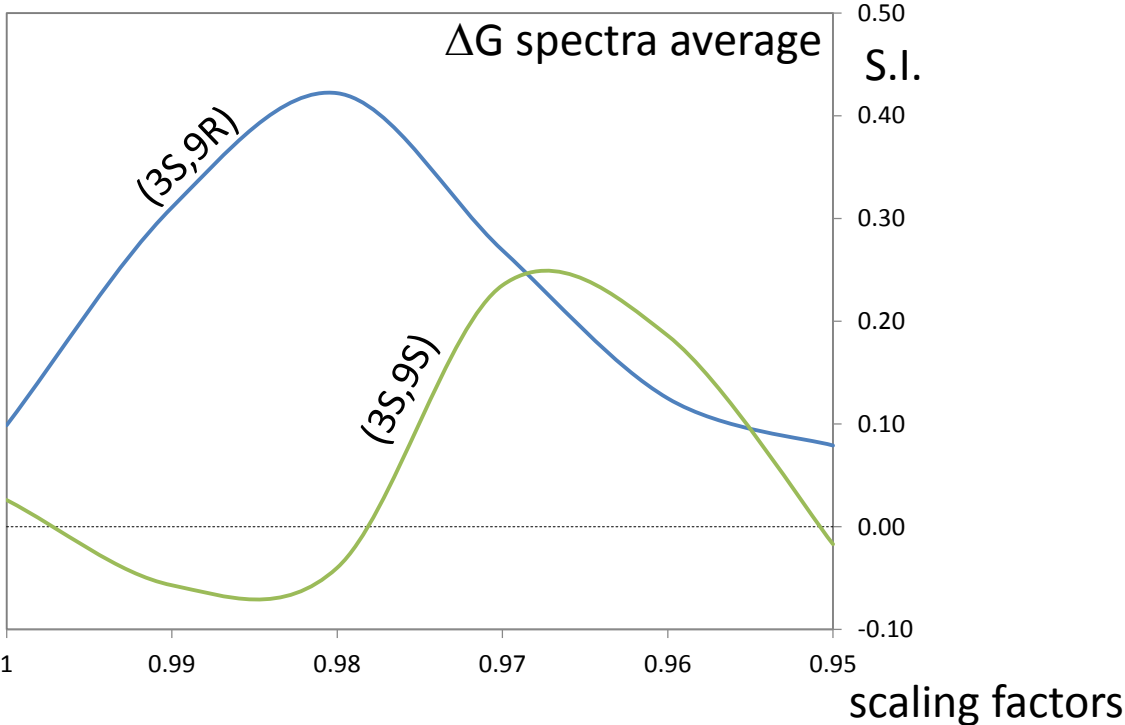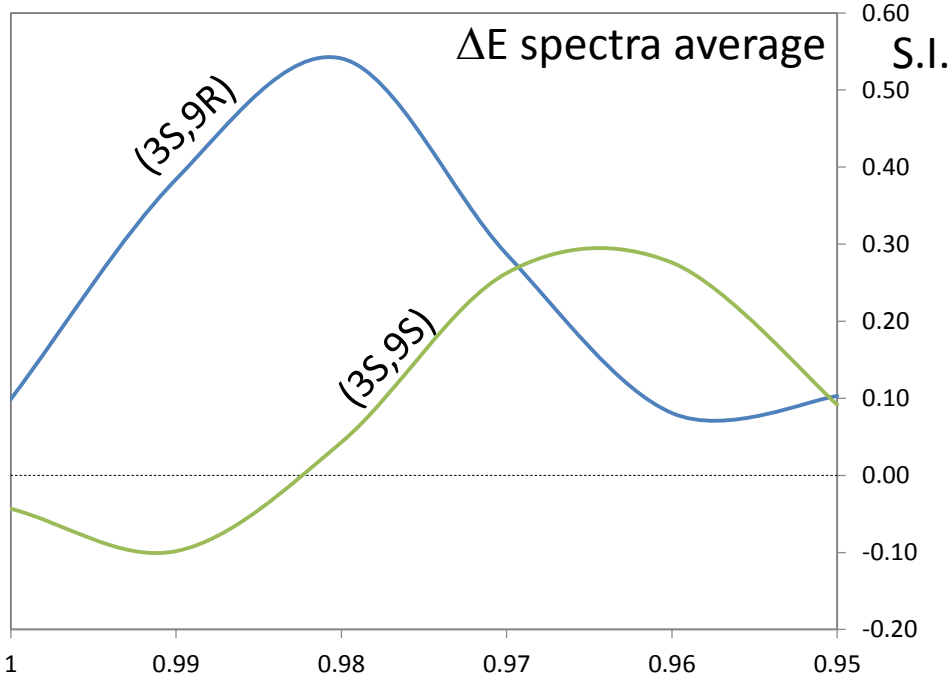

TABLE S2

1: AC (3*S*,9*R*) Computed Poputation Factors $\Delta E$ 

| CONFORMERS | $\Delta E$ | % pop |
|------------|------------|-------|
| 337        | 0.000000   | 12.5  |
| 44         | 0.042573   | 11.7  |
| 360        | 0.134554   | 10.0  |
| 23         | 0.307920   | 7.5   |
| 21         | 0.307982   | 7.5   |
| 26         | 0.328297   | 7.2   |
| 6          | 0.329300   | 7.2   |
| 79         | 0.329551   | 7.2   |
| 58         | 0.486803   | 5.5   |
| 18         | 0.559409   | 4.9   |
| 165        | 0.947522   | 2.5   |
| 124        | 0.981757   | 2.4   |
| 323        | 1.104899   | 1.9   |
| 196        | 1.230111   | 1.6   |
| 118        | 1.334256   | 1.3   |
| 250        | 1.403289   | 1.2   |
| 60         | 1.432820   | 1.1   |
| 19         | 1.568879   | 0.9   |
| 81         | 1.596844   | 0.8   |
| 227        | 1.663368   | 0.8   |
| 59         | 1.681802   | 0.7   |
| 262        | 1.879683   | 0.5   |
| 104        | 1.909842   | 0.5   |
| 269        | 1.967150   | 0.5   |
| 80         | 1.975928   | 0.4   |
| 154        | 1.978248   | 0.4   |
| 65         | 1.978310   | 0.4   |
| 2          | 2.169545   | 0.3   |
| 28         | 2.188669   | 0.3   |
| 127        | 2.400971   | 0.2   |

Conformational Search B3LYP/6-31G\* on 368 conformers.  
 Re-optimized with frequency calculated at B3LYP/6-311++G(2d,p)

§ Original numbering of the conformers from the MM conformational search has been maintained

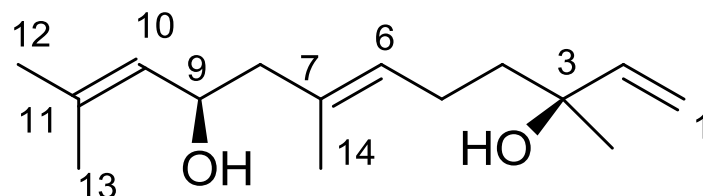

1, CL1, 9-Hydroxynerylolidol

 $\Delta G$ 

| CONFORMERS | $\Delta G$ | % pop |
|------------|------------|-------|
| 337        | 0.000000   | 28.1  |
| 360        | 0.030723   | 26.7  |
| 323        | 0.779361   | 7.5   |
| 104        | 1.010097   | 5.1   |
| 80         | 1.065273   | 4.7   |
| 79         | 1.106655   | 4.3   |
| 23         | 1.136124   | 4.1   |
| 6          | 1.350558   | 2.9   |
| 44         | 1.586937   | 1.9   |
| 18         | 1.622049   | 1.8   |
| 227        | 1.636470   | 1.8   |
| 59         | 1.673463   | 1.7   |
| 269        | 1.701051   | 1.6   |
| 58         | 1.771902   | 1.4   |
| 26         | 1.826451   | 1.3   |
| 165        | 2.101077   | 0.8   |
| 124        | 2.129292   | 0.8   |
| 21         | 2.215191   | 0.7   |
| 118        | 2.361909   | 0.5   |
| 60         | 2.415204   | 0.5   |
| 196        | 2.597034   | 0.4   |
| 28         | 2.650956   | 0.3   |
| 81         | 2.855358   | 0.2   |
| 262        | 2.980758   | 0.2   |
| 65         | 2.982012   | 0.2   |
| 154        | 2.985147   | 0.2   |
| 250        | 3.069792   | 0.2   |
| 19         | 3.377022   | 0.1   |
| 2          | 3.546312   | 0.1   |
| 127        | 3.853542   | 0.0   |

(3*S*,9*R*)-1

FIGURE S2

# Populations; Conformers for ( $\geq 10\%$ )-P.F.-based on $\Delta E$

CONFORMERS     $\Delta E$     % pop

|     |          |      |
|-----|----------|------|
| 337 | 0.000000 | 12.5 |
| 44  | 0.042573 | 11.7 |
| 360 | 0.134554 | 10.0 |
| 23  | 0.307920 | 7.5  |
| 21  | 0.307982 | 7.5  |
| 26  | 0.328297 | 7.2  |
| 6   | 0.329300 | 7.2  |
| 79  | 0.329551 | 7.2  |
| 58  | 0.486803 | 5.5  |
| 18  | 0.559409 | 4.9  |
| 165 | 0.947522 | 2.5  |
| 124 | 0.981757 | 2.4  |
| 323 | 1.104899 | 1.9  |
| 196 | 1.230111 | 1.6  |
| 118 | 1.334256 | 1.3  |
| 250 | 1.403289 | 1.2  |
| 60  | 1.432820 | 1.1  |
| 19  | 1.568879 | 0.9  |
| 81  | 1.596844 | 0.8  |
| 227 | 1.663368 | 0.8  |
| 59  | 1.681802 | 0.7  |
| 262 | 1.879683 | 0.5  |
| 104 | 1.909842 | 0.5  |
| 269 | 1.967150 | 0.5  |
| 80  | 1.975928 | 0.4  |
| 154 | 1.978248 | 0.4  |
| 65  | 1.978310 | 0.4  |
| 2   | 2.169545 | 0.3  |
| 28  | 2.188669 | 0.3  |
| 127 | 2.400971 | 0.2  |

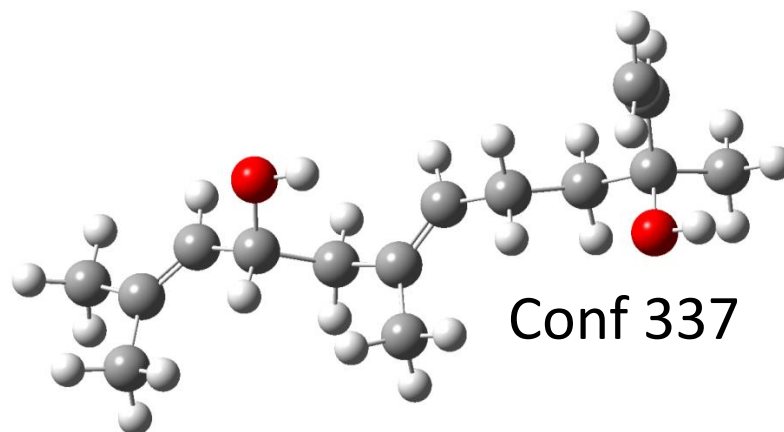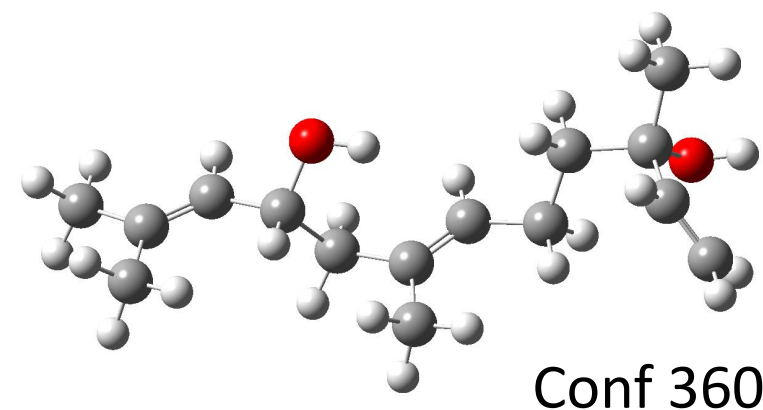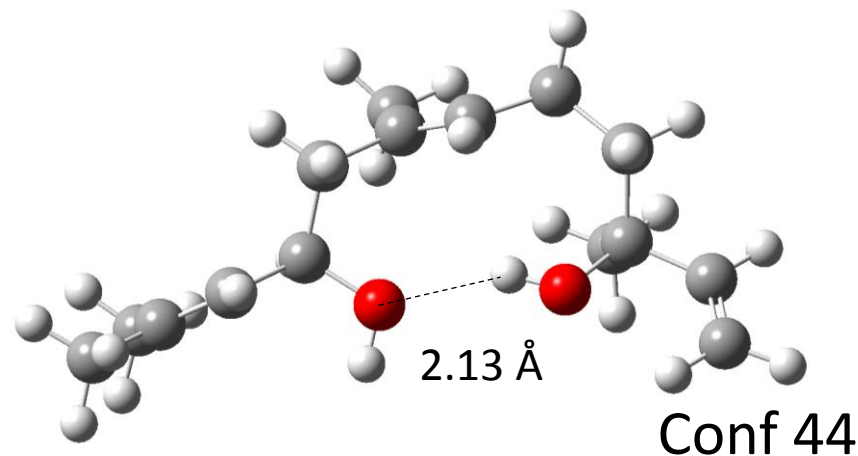

(3*S*,9*R*)-1

FIGURE S3

Populations; Conformers for P.F. (9%-5%) based on  $\Delta E$  $\Delta E$ 

| CONFORMERS | $\Delta E$ | % pop |
|------------|------------|-------|
| 337        | 0.000000   | 12.5  |
| 44         | 0.042573   | 11.7  |
| 360        | 0.134554   | 10.0  |
| 23         | 0.307920   | 7.5   |
| 21         | 0.307982   | 7.5   |
| 26         | 0.328297   | 7.2   |
| 6          | 0.329300   | 7.2   |
| 79         | 0.329551   | 7.2   |
| 58         | 0.486803   | 5.5   |
| 18         | 0.559409   | 4.9   |
| 165        | 0.947522   | 2.5   |
| 124        | 0.981757   | 2.4   |
| 323        | 1.104899   | 1.9   |
| 196        | 1.230111   | 1.6   |
| 118        | 1.334256   | 1.3   |
| 250        | 1.403289   | 1.2   |
| 60         | 1.432820   | 1.1   |
| 19         | 1.568879   | 0.9   |
| 81         | 1.596844   | 0.8   |
| 227        | 1.663368   | 0.8   |
| 59         | 1.681802   | 0.7   |
| 262        | 1.879683   | 0.5   |
| 104        | 1.909842   | 0.5   |
| 269        | 1.967150   | 0.5   |
| 80         | 1.975928   | 0.4   |
| 154        | 1.978248   | 0.4   |
| 65         | 1.978310   | 0.4   |
| 2          | 2.169545   | 0.3   |
| 28         | 2.188669   | 0.3   |
| 127        | 2.400971   | 0.2   |

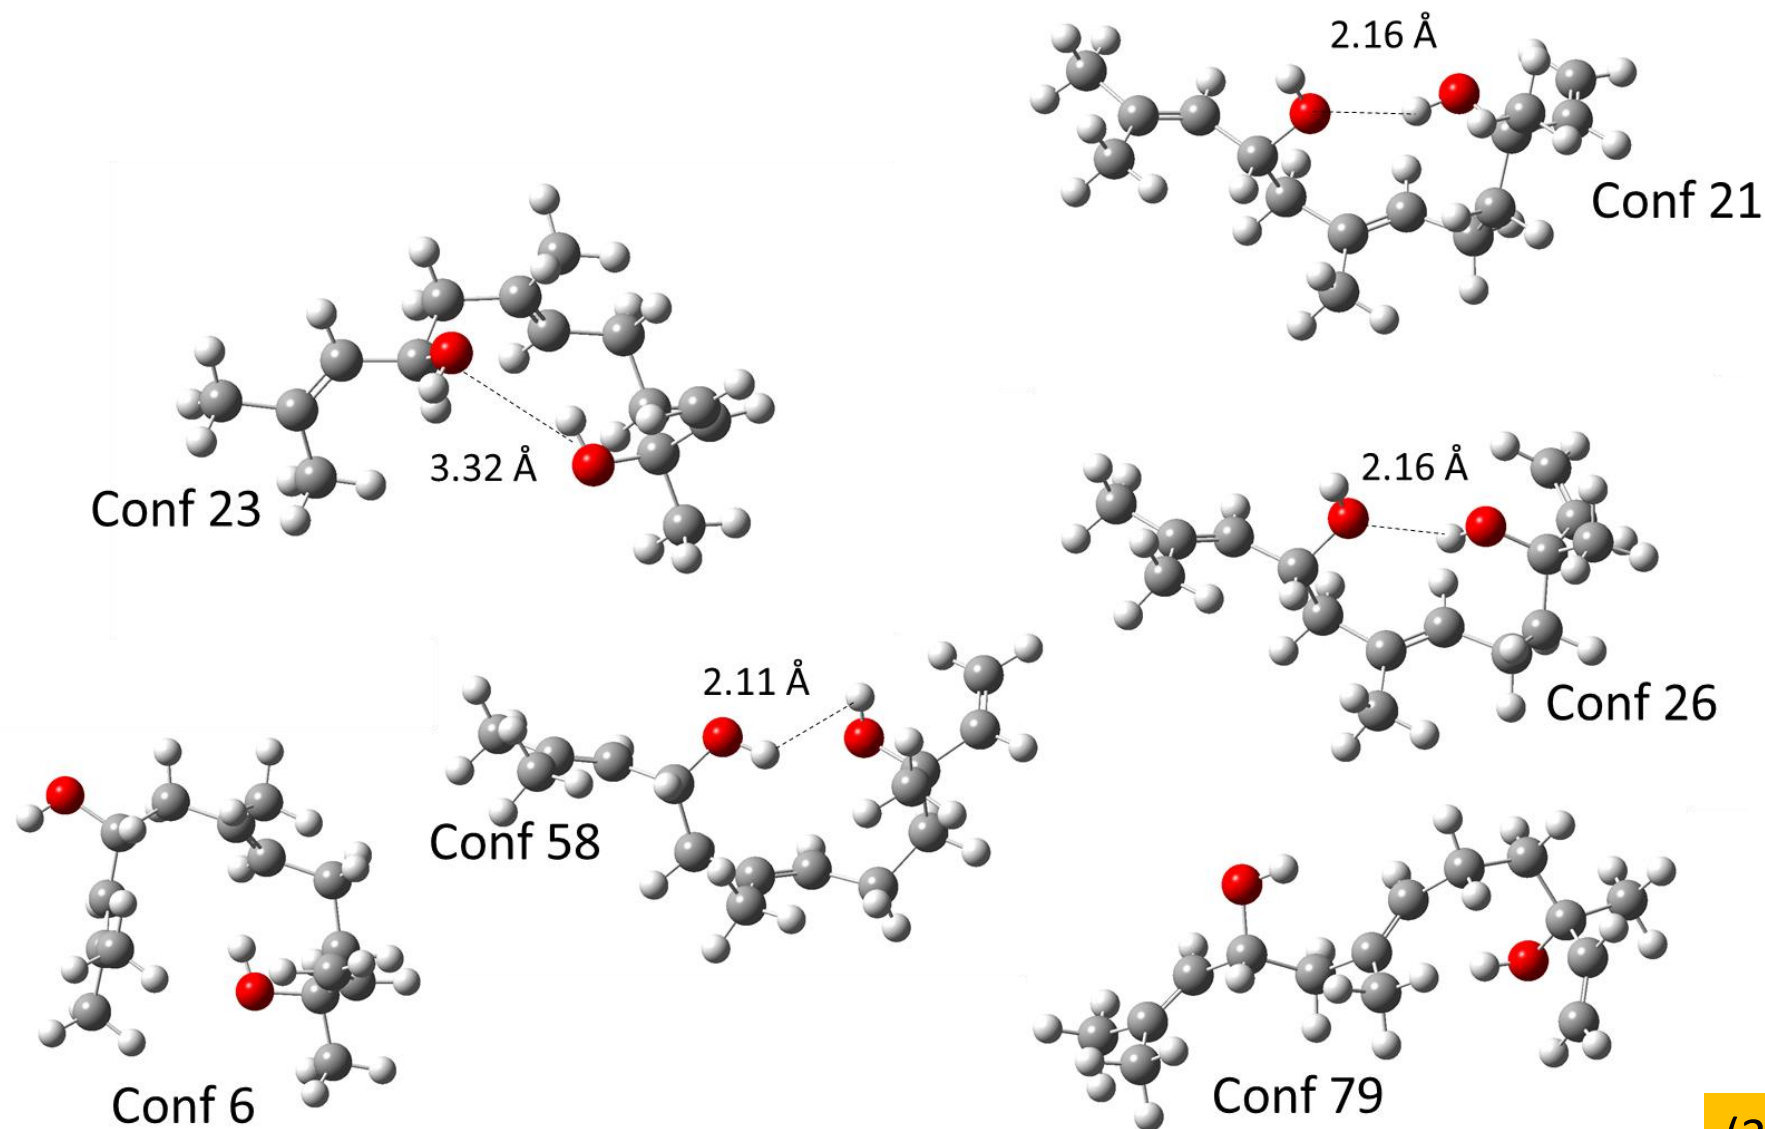(3*S*,9*R*)-1

FIGURE S4

# Populations; Conformers for P.F. (5%-1.5%) based on $\Delta E$

CONFORMERS     $\Delta E$     % pop

|     |          |      |
|-----|----------|------|
| 337 | 0.000000 | 12.5 |
| 44  | 0.042573 | 11.7 |
| 360 | 0.134554 | 10.0 |
| 23  | 0.307920 | 7.5  |
| 21  | 0.307982 | 7.5  |
| 26  | 0.328297 | 7.2  |
| 6   | 0.329300 | 7.2  |
| 79  | 0.329551 | 7.2  |
| 58  | 0.486803 | 5.5  |
| 18  | 0.559409 | 4.9  |
| 165 | 0.947522 | 2.5  |
| 124 | 0.981757 | 2.4  |
| 323 | 1.104899 | 1.9  |
| 196 | 1.230111 | 1.6  |
| 118 | 1.334256 | 1.3  |
| 250 | 1.403289 | 1.2  |
| 60  | 1.432820 | 1.1  |
| 19  | 1.568879 | 0.9  |
| 81  | 1.596844 | 0.8  |
| 227 | 1.663368 | 0.8  |
| 59  | 1.681802 | 0.7  |
| 262 | 1.879683 | 0.5  |
| 104 | 1.909842 | 0.5  |
| 269 | 1.967150 | 0.5  |
| 80  | 1.975928 | 0.4  |
| 154 | 1.978248 | 0.4  |
| 65  | 1.978310 | 0.4  |
| 2   | 2.169545 | 0.3  |
| 28  | 2.188669 | 0.3  |
| 127 | 2.400971 | 0.2  |

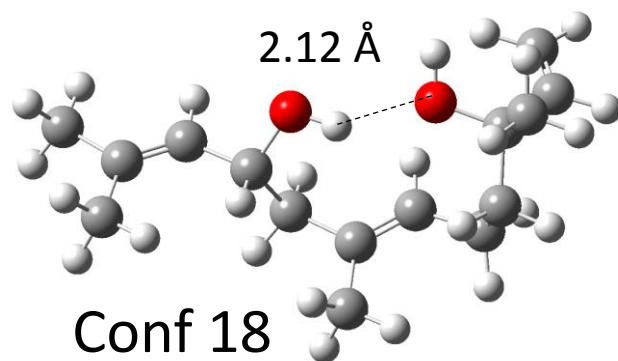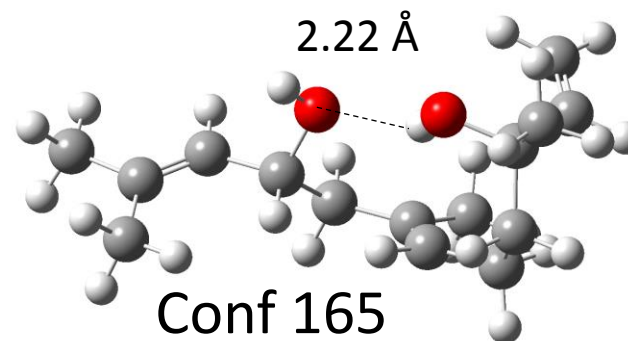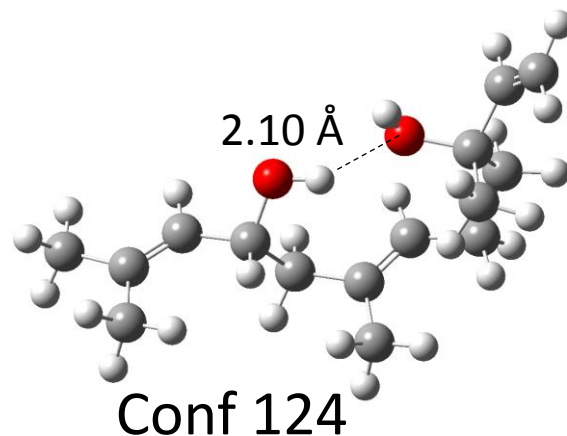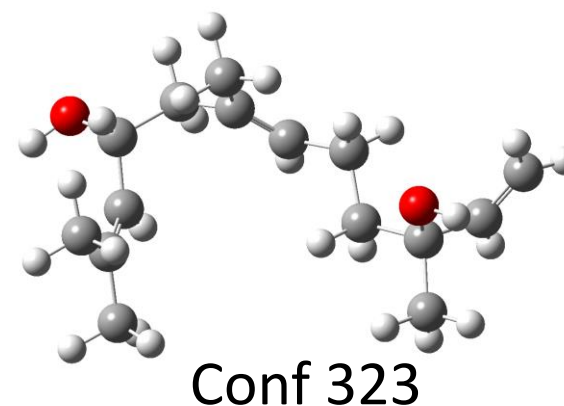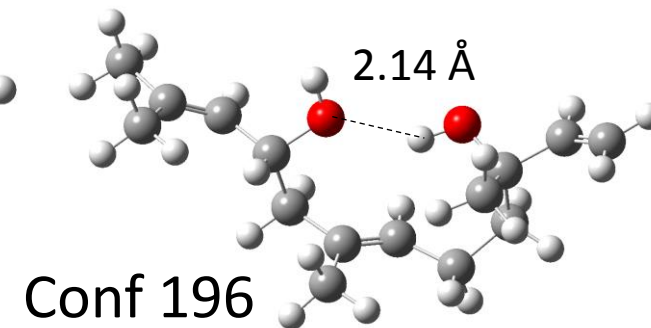

(3*S*,9*R*)-1



FIGURE S5

Populations; Conformers for ( $\geq 20\%$ )-P.F.-based on  $\Delta G$  $\Delta G$ 

| CONFORMERS | $\Delta G$ | % pop |
|------------|------------|-------|
| 337        | 0.000000   | 28.1  |
| 360        | 0.030723   | 26.7  |
| 323        | 0.779361   | 7.5   |
| 104        | 1.010097   | 5.1   |
| 80         | 1.065273   | 4.7   |
| 79         | 1.106655   | 4.3   |
| 23         | 1.136124   | 4.1   |
| 6          | 1.350558   | 2.9   |
| 44         | 1.586937   | 1.9   |
| 18         | 1.622049   | 1.8   |
| 227        | 1.636470   | 1.8   |
| 59         | 1.673463   | 1.7   |
| 269        | 1.701051   | 1.6   |
| 58         | 1.771902   | 1.4   |
| 26         | 1.826451   | 1.3   |
| 165        | 2.101077   | 0.8   |
| 124        | 2.129292   | 0.8   |
| 21         | 2.215191   | 0.7   |
| 118        | 2.361909   | 0.5   |
| 60         | 2.415204   | 0.5   |
| 196        | 2.597034   | 0.4   |
| 28         | 2.650956   | 0.3   |
| 81         | 2.855358   | 0.2   |
| 262        | 2.980758   | 0.2   |
| 65         | 2.982012   | 0.2   |
| 154        | 2.985147   | 0.2   |
| 250        | 3.069792   | 0.2   |
| 19         | 3.377022   | 0.1   |
| 2          | 3.546312   | 0.1   |
| 127        | 3.853542   | 0.0   |

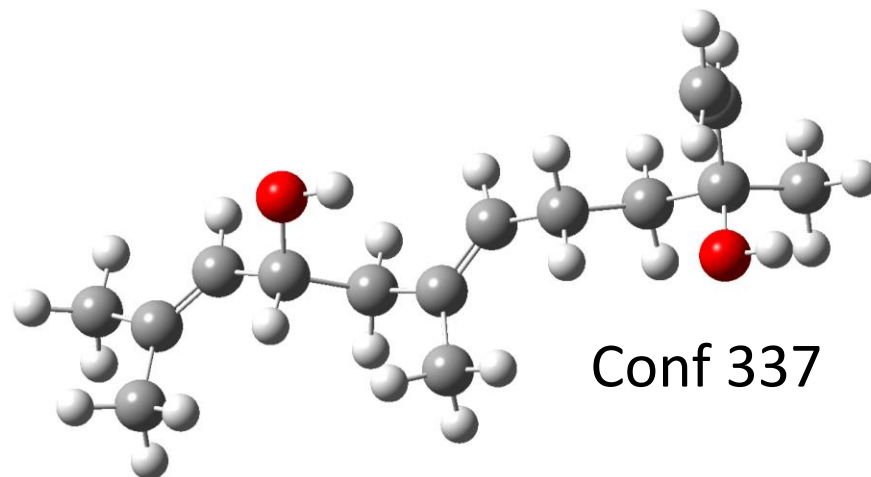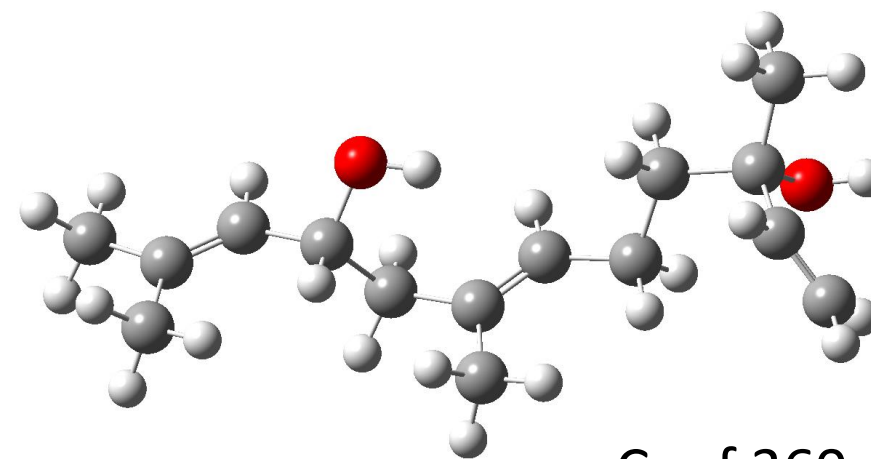

Conf 360

(3*S*,9*R*)-1



FIGURE S6

# Populations; Conformers for (9% – 2%)P.F.-based on $\Delta G$

 $\Delta G$ 

| CONFORMERS | $\Delta G$ | % pop |
|------------|------------|-------|
| 337        | 0.000000   | 28.1  |
| 360        | 0.030723   | 26.7  |
| 323        | 0.779361   | 7.5   |
| 104        | 1.010097   | 5.1   |
| 80         | 1.065273   | 4.7   |
| 79         | 1.106655   | 4.3   |
| 23         | 1.136124   | 4.1   |
| 6          | 1.350558   | 2.9   |
| 44         | 1.586937   | 1.9   |
| 18         | 1.622049   | 1.8   |
| 227        | 1.636470   | 1.8   |
| 59         | 1.673463   | 1.7   |
| 269        | 1.701051   | 1.6   |
| 58         | 1.771902   | 1.4   |
| 26         | 1.826451   | 1.3   |
| 165        | 2.101077   | 0.8   |
| 124        | 2.129292   | 0.8   |
| 21         | 2.215191   | 0.7   |
| 118        | 2.361909   | 0.5   |
| 60         | 2.415204   | 0.5   |
| 196        | 2.597034   | 0.4   |
| 28         | 2.650956   | 0.3   |
| 81         | 2.855358   | 0.2   |
| 262        | 2.980758   | 0.2   |
| 65         | 2.982012   | 0.2   |
| 154        | 2.985147   | 0.2   |
| 250        | 3.069792   | 0.2   |
| 19         | 3.377022   | 0.1   |
| 2          | 3.546312   | 0.1   |
| 127        | 3.853542   | 0.0   |

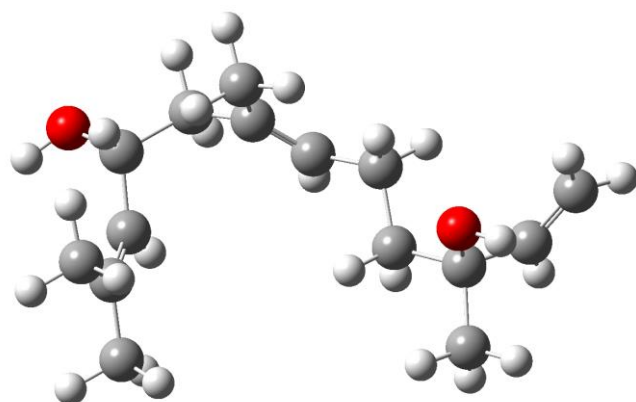

Conf 323

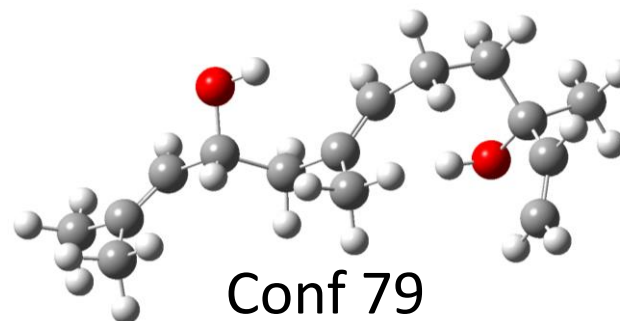

Conf 79

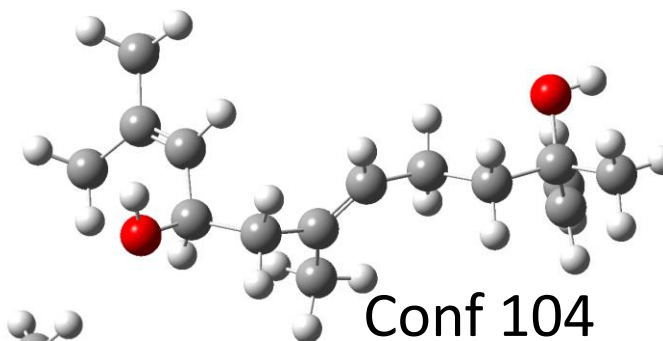

Conf 104

<1% in  $\Delta E$ 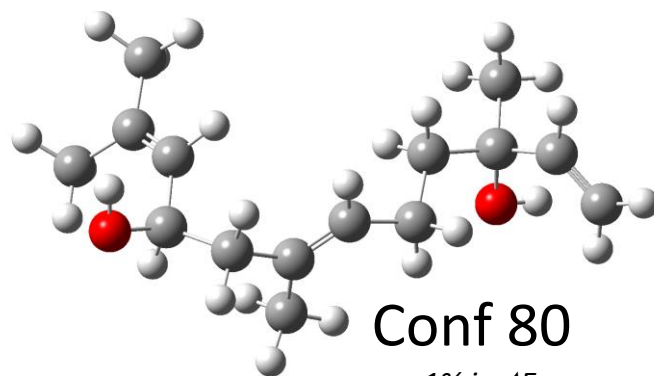

Conf 80

<1% in  $\Delta E$ 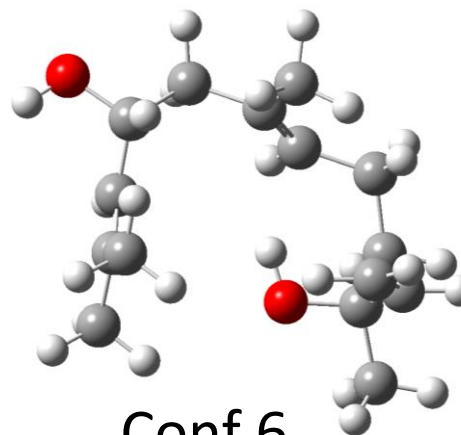

Conf 6

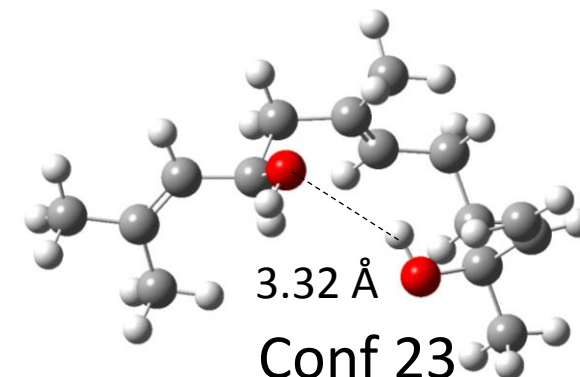

3.32 Å

Conf 23

(3*S*,9*R*)-1

FIGURE S7

# Populations; Conformers for (2% – 1%)P.F.-based on $\Delta G$

## $\Delta G$

| CONFORMERS | $\Delta G$ | % pop |
|------------|------------|-------|
| 337        | 0.000000   | 28.1  |
| 360        | 0.030723   | 26.7  |
| 323        | 0.779361   | 7.5   |
| 104        | 1.010097   | 5.1   |
| 80         | 1.065273   | 4.7   |
| 79         | 1.106655   | 4.3   |
| 23         | 1.136124   | 4.1   |
| 6          | 1.350558   | 2.9   |
| 44         | 1.586937   | 1.9   |
| 18         | 1.622049   | 1.8   |
| 227        | 1.636470   | 1.8   |
| 59         | 1.673463   | 1.7   |
| 269        | 1.701051   | 1.6   |
| 58         | 1.771902   | 1.4   |
| 26         | 1.826451   | 1.3   |
| 165        | 2.101077   | 0.8   |
| 124        | 2.129292   | 0.8   |
| 21         | 2.215191   | 0.7   |
| 118        | 2.361909   | 0.5   |
| 60         | 2.415204   | 0.5   |
| 196        | 2.597034   | 0.4   |
| 28         | 2.650956   | 0.3   |
| 81         | 2.855358   | 0.2   |
| 262        | 2.980758   | 0.2   |
| 65         | 2.982012   | 0.2   |
| 154        | 2.985147   | 0.2   |
| 250        | 3.069792   | 0.2   |
| 19         | 3.377022   | 0.1   |
| 2          | 3.546312   | 0.1   |
| 127        | 3.853542   | 0.0   |

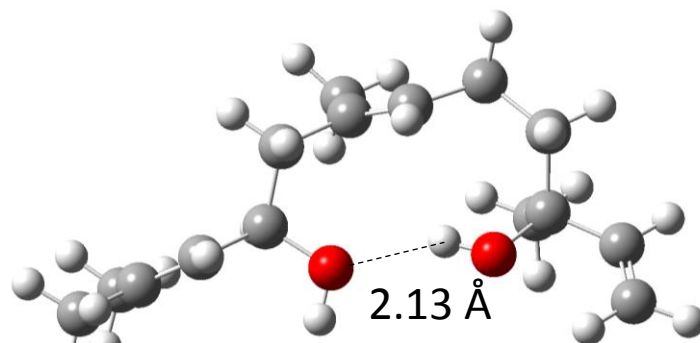

Conf 44

11.7% in  $\Delta E$ 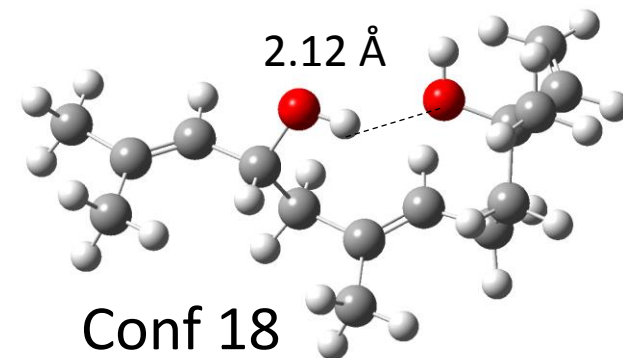

Conf 18

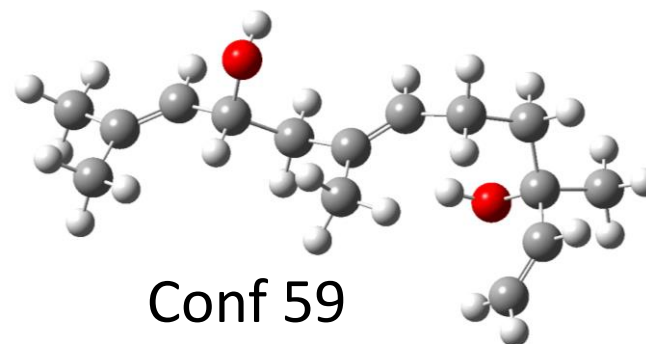

Conf 59

<1% in  $\Delta E$ 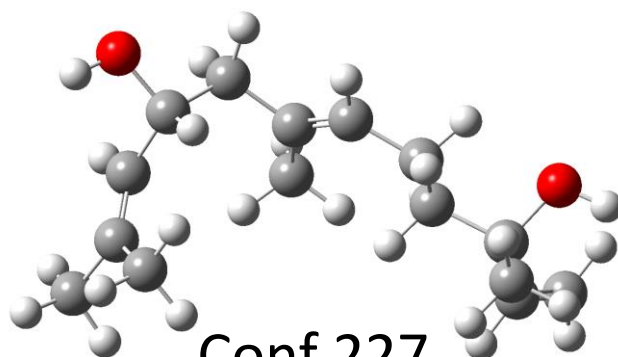

Conf 227

<1% in  $\Delta E$ 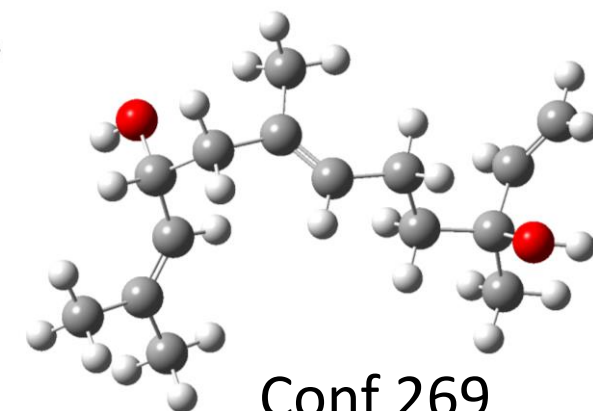

Conf 269

<1% in  $\Delta E$ 

(3S,9R)-1

TABLE S3

# 1: AC (3S,9S) Computed Poputation Factors

Conformational Search B3LYP/6-31G\* on 264 conformers.

Re-optimized with frequency calculated at B3LYP/6-311++G(2d,p)

§ Original numbering of the conformers from the MM conformational search has been maintained

| $\Delta E$ |            |       |
|------------|------------|-------|
| CONFORMERS | $\Delta E$ | % pop |
| 16         | 0.000000   | 45.8  |
| 1          | 0.732775   | 13.3  |
| 4          | 0.742180   | 13.1  |
| 61         | 1.209358   | 6.0   |
| 38         | 1.271870   | 5.4   |
| 57         | 1.512324   | 3.6   |
| 90         | 1.643367   | 2.9   |
| 2          | 1.684373   | 2.7   |
| 153        | 1.800368   | 2.2   |
| 85         | 1.967526   | 1.7   |
| 24         | 2.009472   | 1.5   |
| 14         | 2.208921   | 1.1   |
| 48         | 2.655157   | 0.5   |
| 115        | 2.944643   | 0.3   |
| 240        | 4.159581   | 0.0   |

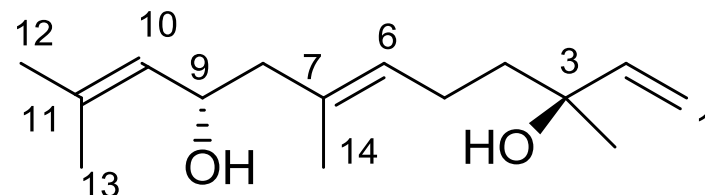

**1, CL1, 9-Hydroxynerylidol**

| $\Delta G$ |            |       |
|------------|------------|-------|
| CONFORMERS | $\Delta G$ | % pop |
| 4          | 0.000000   | 73.4  |
| 1          | 0.732775   | 9.9   |
| 38         | 0.742180   | 5.3   |
| 57         | 1.209358   | 3.2   |
| 16         | 1.271870   | 1.5   |
| 61         | 1.512324   | 1.5   |
| 14         | 1.643367   | 1.4   |
| 2          | 1.684373   | 1.2   |
| 90         | 1.800368   | 0.8   |
| 153        | 1.967526   | 0.6   |
| 24         | 2.009472   | 0.6   |
| 85         | 2.208921   | 0.3   |
| 48         | 2.655157   | 0.2   |
| 115        | 2.944643   | 0.1   |
| 240        | 4.159581   | 0.1   |

FIGURE S8

# Populations; Conformers for ( $\geq 20\%$ )-P.F.-based on $\Delta E$

 $\Delta E$ 

| CONFORMERS | $\Delta E$ | % pop |
|------------|------------|-------|
| 16         | 0.000000   | 45.8  |
| 1          | 0.732775   | 13.3  |
| 4          | 0.742180   | 13.1  |
| 61         | 1.209358   | 6.0   |
| 38         | 1.271870   | 5.4   |
| 57         | 1.512324   | 3.6   |
| 90         | 1.643367   | 2.9   |
| 2          | 1.684373   | 2.7   |
| 153        | 1.800368   | 2.2   |
| 85         | 1.967526   | 1.7   |
| 24         | 2.009472   | 1.5   |
| 14         | 2.208921   | 1.1   |
| 48         | 2.655157   | 0.5   |
| 115        | 2.944643   | 0.3   |
| 240        | 4.159581   | 0.0   |

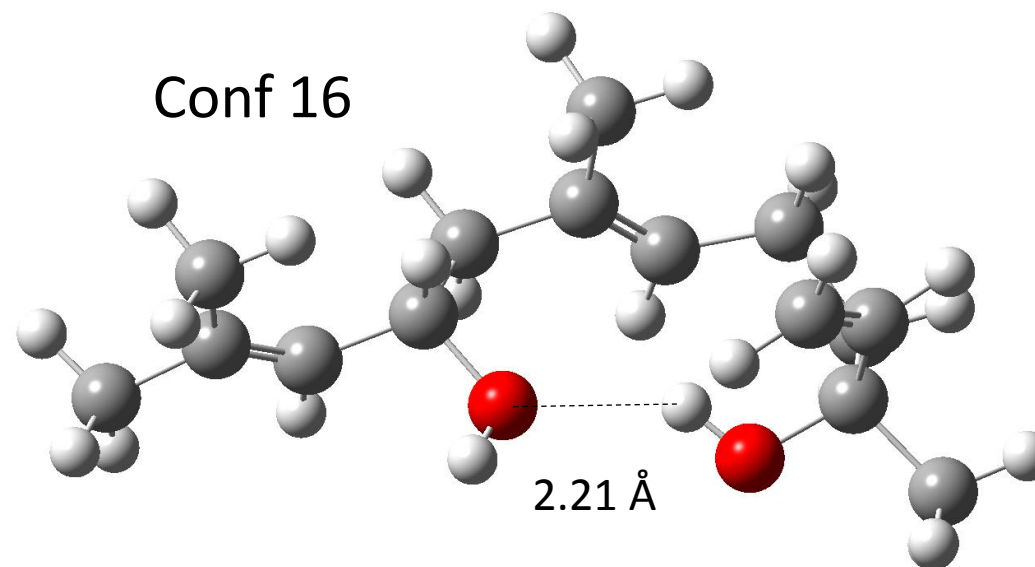

FIGURE S9

Populations; Conformers for (20%-10%)-P.F.-based on  $\Delta E$  $\Delta E$ 

| CONFORMERS | $\Delta E$ | % pop |
|------------|------------|-------|
| 16         | 0.000000   | 45.8  |
| 1          | 0.732775   | 13.3  |
| 4          | 0.742180   | 13.1  |
| 61         | 1.209358   | 6.0   |
| 38         | 1.271870   | 5.4   |
| 57         | 1.512324   | 3.6   |
| 90         | 1.643367   | 2.9   |
| 2          | 1.684373   | 2.7   |
| 153        | 1.800368   | 2.2   |
| 85         | 1.967526   | 1.7   |
| 24         | 2.009472   | 1.5   |
| 14         | 2.208921   | 1.1   |
| 48         | 2.655157   | 0.5   |
| 115        | 2.944643   | 0.3   |
| 240        | 4.159581   | 0.0   |

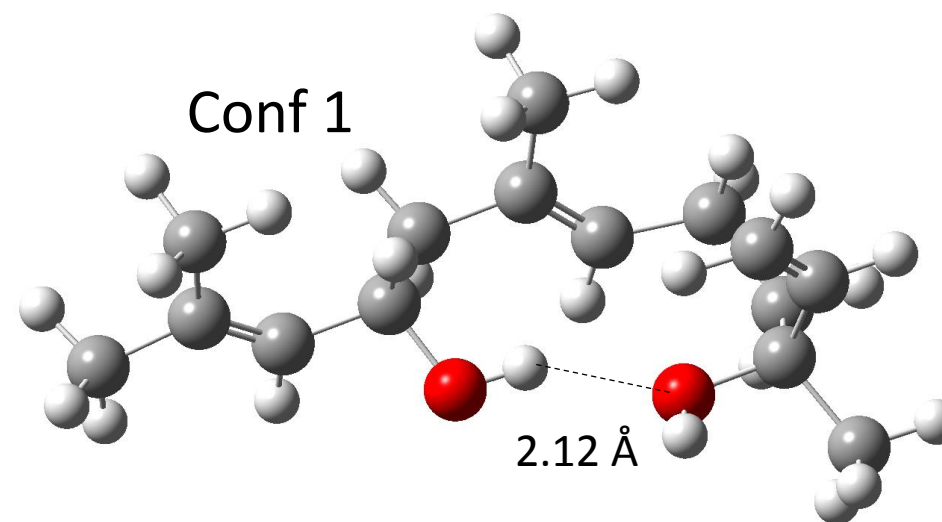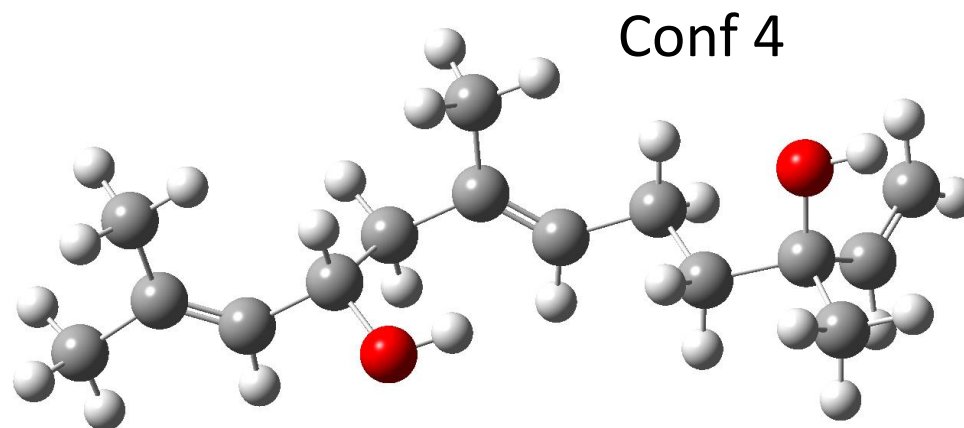

FIGURE S10

# Populations; Conformers for P.F. (10%-3%) based on $\Delta E$

 $\Delta E$ 

| CONFORMERS | $\Delta E$ | % pop |
|------------|------------|-------|
| 16         | 0.000000   | 45.8  |
| 1          | 0.732775   | 13.3  |
| 4          | 0.742180   | 13.1  |
| 61         | 1.209358   | 6.0   |
| 38         | 1.271870   | 5.4   |
| 57         | 1.512324   | 3.6   |
| 90         | 1.643367   | 2.9   |
| 2          | 1.684373   | 2.7   |
| 153        | 1.800368   | 2.2   |
| 85         | 1.967526   | 1.7   |
| 24         | 2.009472   | 1.5   |
| 14         | 2.208921   | 1.1   |
| 48         | 2.655157   | 0.5   |
| 115        | 2.944643   | 0.3   |
| 240        | 4.159581   | 0.0   |

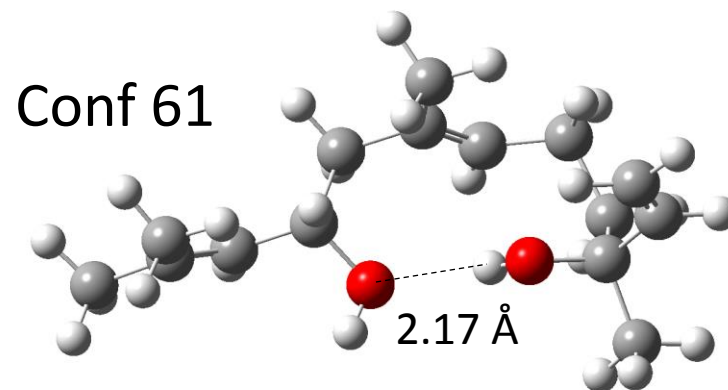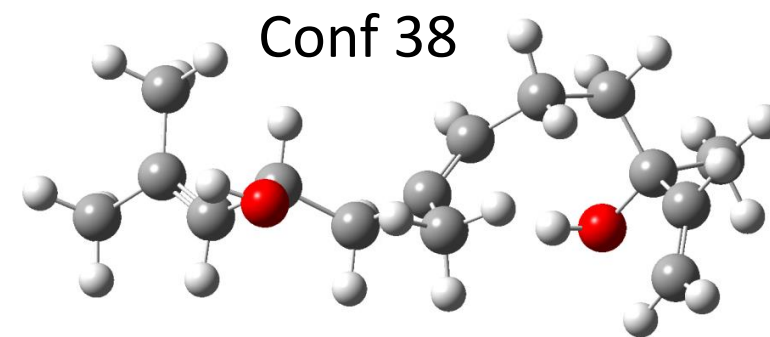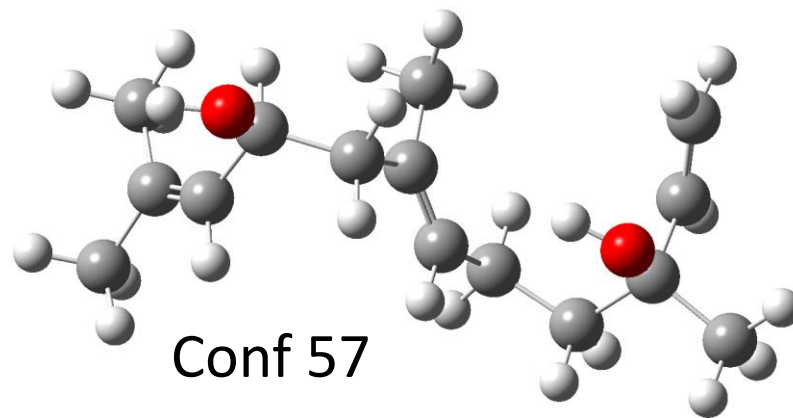



FIGURE S11

Populations; Conformers for P.F. based on  $\Delta E$  (<3%) $\Delta E$ **CONFORMERS**    $\Delta E$    % pop

|     |          |      |
|-----|----------|------|
| 16  | 0.000000 | 45.8 |
| 1   | 0.732775 | 13.3 |
| 4   | 0.742180 | 13.1 |
| 61  | 1.209358 | 6.0  |
| 38  | 1.271870 | 5.4  |
| 57  | 1.512324 | 3.6  |
| 90  | 1.643367 | 2.9  |
| 2   | 1.684373 | 2.7  |
| 153 | 1.800368 | 2.2  |
| 85  | 1.967526 | 1.7  |
| 24  | 2.009472 | 1.5  |
| 14  | 2.208921 | 1.1  |
| 48  | 2.655157 | 0.5  |
| 115 | 2.944643 | 0.3  |
| 240 | 4.159581 | 0.0  |

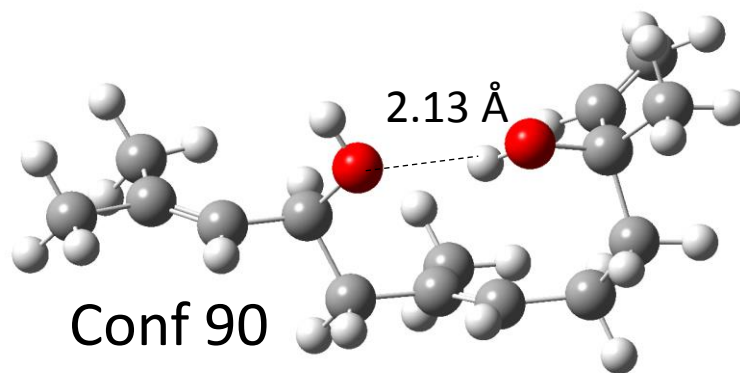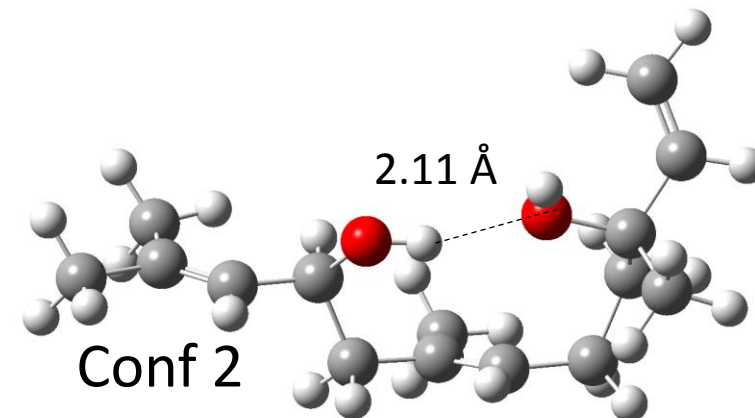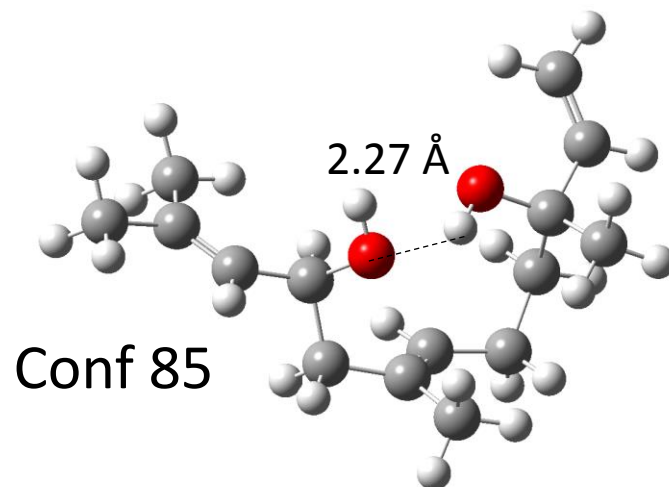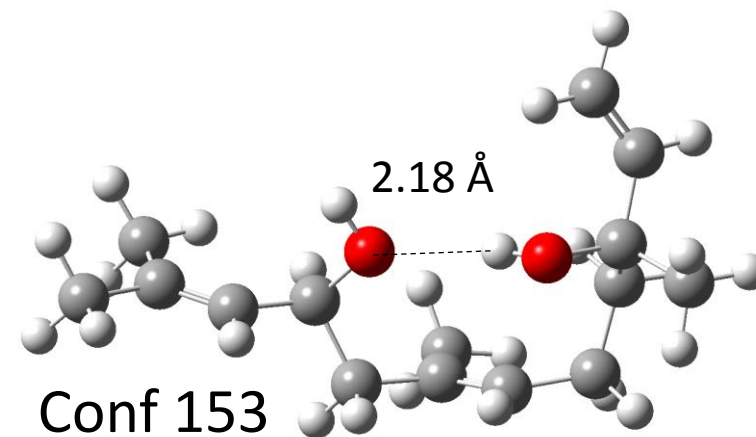



FIGURE S12

# Populations; Conformers for ( $\geq 20\%$ )-P.F.-based on $\Delta G$

 $\Delta G$ 

| CONFORMERS | $\Delta G$ | % pop |
|------------|------------|-------|
| 4          | 0.000000   | 73.4  |
| 1          | 0.732775   | 9.9   |
| 38         | 0.742180   | 5.3   |
| 57         | 1.209358   | 3.2   |
| 16         | 1.271870   | 1.5   |
| 61         | 1.512324   | 1.5   |
| 14         | 1.643367   | 1.4   |
| 2          | 1.684373   | 1.2   |
| 90         | 1.800368   | 0.8   |
| 153        | 1.967526   | 0.6   |
| 24         | 2.009472   | 0.6   |
| 85         | 2.208921   | 0.3   |
| 48         | 2.655157   | 0.2   |
| 115        | 2.944643   | 0.1   |
| 240        | 4.159581   | 0.1   |

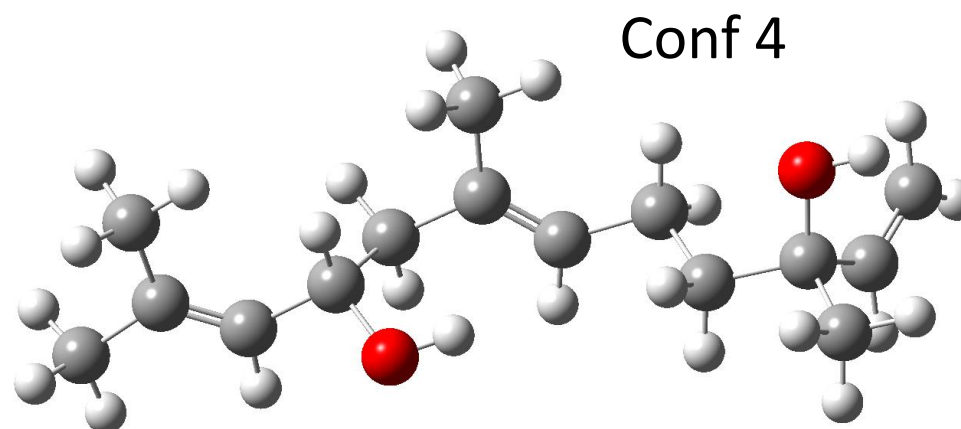

FIGURE S13

Populations; Conformers for (10%-3%) based on  $\Delta G$ 

| $\Delta G$ |            |       |
|------------|------------|-------|
| CONFORMERS | $\Delta G$ | % pop |
| 4          | 0.000000   | 73.4  |
| 1          | 0.732775   | 9.9   |
| 38         | 0.742180   | 5.3   |
| 57         | 1.209358   | 3.2   |
| 16         | 1.271870   | 1.5   |
| 61         | 1.512324   | 1.5   |
| 14         | 1.643367   | 1.4   |
| 2          | 1.684373   | 1.2   |
| 90         | 1.800368   | 0.8   |
| 153        | 1.967526   | 0.6   |
| 24         | 2.009472   | 0.6   |
| 85         | 2.208921   | 0.3   |
| 48         | 2.655157   | 0.2   |
| 115        | 2.944643   | 0.1   |
| 240        | 4.159581   | 0.1   |

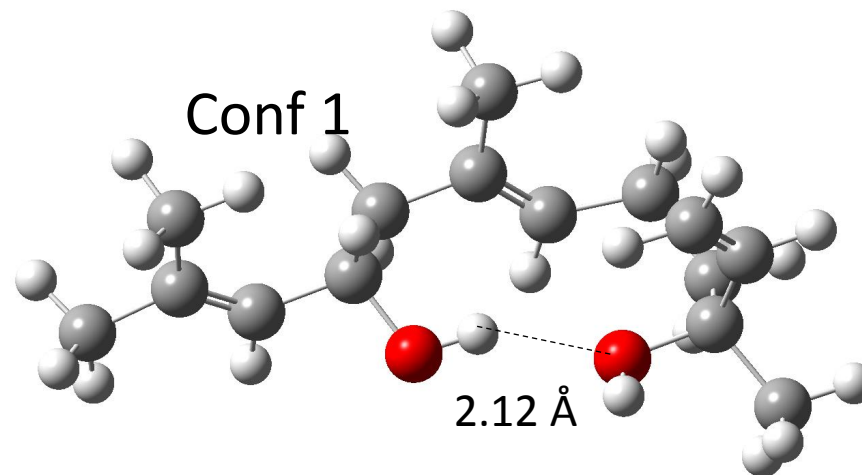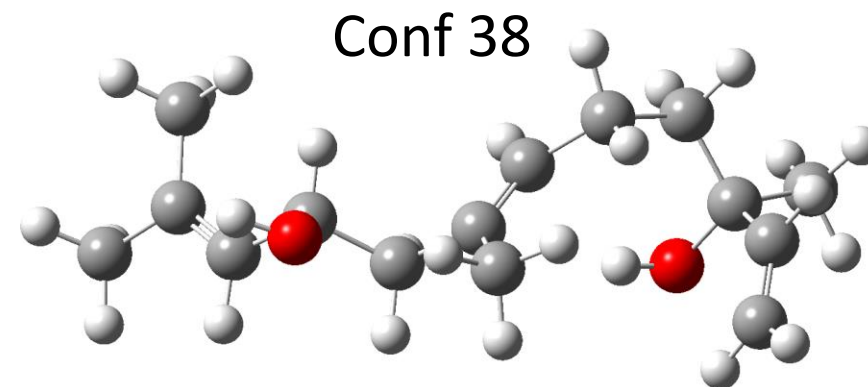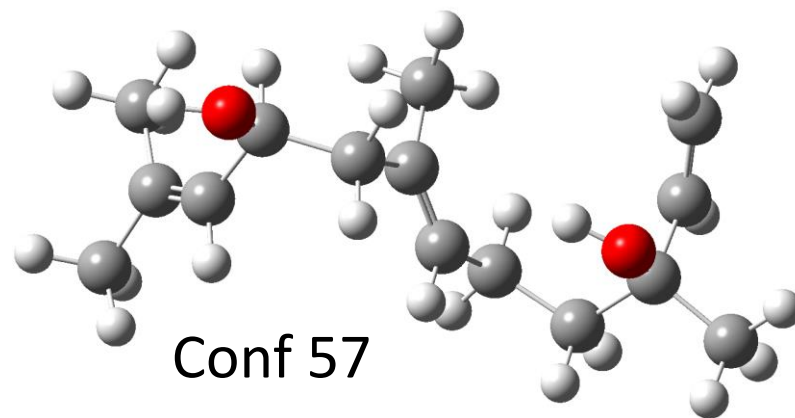

(3S,9S)-1

FIGURE S14

Populations; Conformers for (3%-1%) based on  $\Delta G$ 

| $\Delta G$ |            |       |
|------------|------------|-------|
| CONFORMERS | $\Delta G$ | % pop |
| 4          | 0.000000   | 73.4  |
| 1          | 0.732775   | 9.9   |
| 38         | 0.742180   | 5.3   |
| 57         | 1.209358   | 3.2   |
| 16         | 1.271870   | 1.5   |
| 61         | 1.512324   | 1.5   |
| 14         | 1.643367   | 1.4   |
| 2          | 1.684373   | 1.2   |
| 90         | 1.800368   | 0.8   |
| 153        | 1.967526   | 0.6   |
| 24         | 2.009472   | 0.6   |
| 85         | 2.208921   | 0.3   |
| 48         | 2.655157   | 0.2   |
| 115        | 2.944643   | 0.1   |
| 240        | 4.159581   | 0.1   |

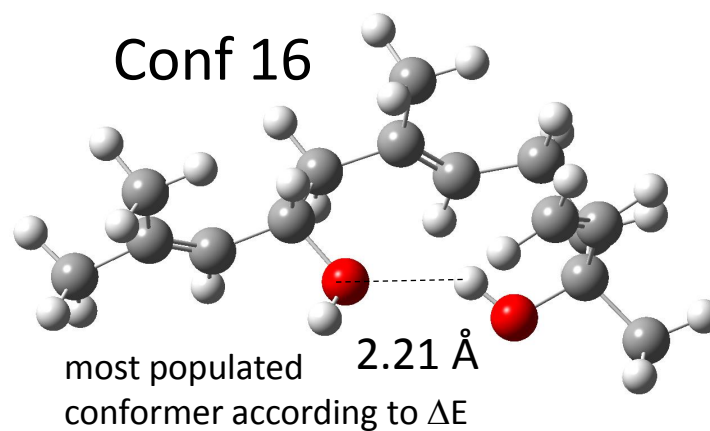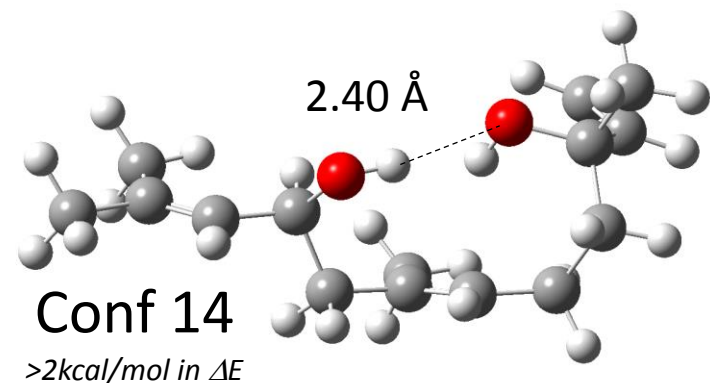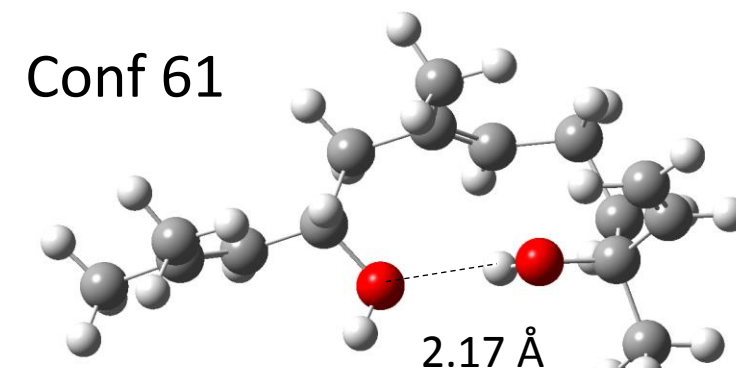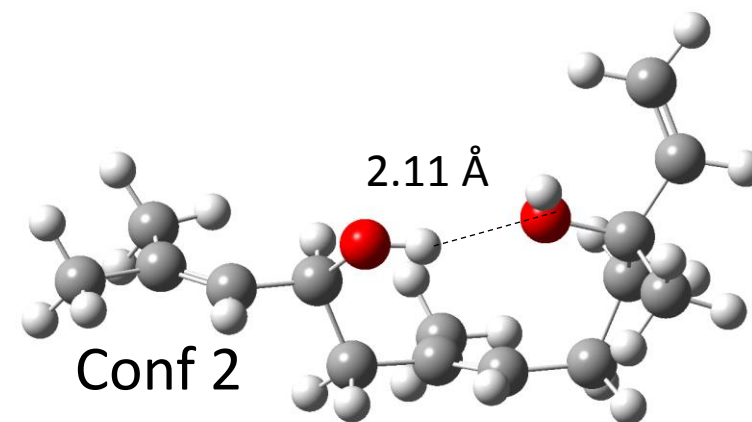

Supplement: s1 [file s1]
